# Supplementary material for: Does Bank Monitoring Reduce Corporate Misreporting? Evidence from Foreign Bank Entry in China
Source: Atypon-hosted journal article supplement (doi:10.1287/mnsc.2022.02414), 2024-09-03
Supplement: mnsc.2022.02414.sm1.pdf [file mnsc.2022.02414.sm1.pdf]

# **Online Appendix**

## Online Appendix A. Proofs of Theoretical Results

**Proof of Proposition 1.** When the condition in part (a) of the proposition holds, the right-hand side of Equation (3) in the main text is positive even for  $\mu = 1$ , so the optimal choice is  $\mu = 1$ , which means  $\phi(\mu) = (1-\mu)B/\lambda f = 0$ . When the condition in part (c) of the proposition holds, the right-hand side of Equation (3) in the main text is negative even for  $\mu = 0$ , so the optimal choice is  $\mu = 0$ , which means  $\phi(\mu) = (1-\mu)B/\lambda f = B/\lambda f$ .

Otherwise, when condition (b) of the proposition holds, Equation (3) holds with equality for a unique choice of  $\mu$  between 0 and 1, so the results for an interior optimum apply. ■

**Proof of Corollary 1.** As noted in the text, these comparative statics follow from taking the derivative (or cross-derivative) of the expression for optimal  $\mu$  in Equation (4) in the text, and from the fact that  $\phi(\mu) = (1-\mu) B/\lambda f$  when the optimal choice of  $\mu$  is interior. ■

**Proof of Corollary 2.** Parts (a) through (c) follow from the definition  $\Phi = (1-\theta) (1-\beta)\phi(\mu)$  and the expressions for optimal  $\mu$  and thus  $\phi(\mu)$  from Proposition 1.

The results in part (d) of the corollary follow from using Equation (4) in the text to obtain optimal  $\mu$ , substituting that into  $\phi(\mu)$ , multiplying by  $(1-\theta) (1-\beta)$  to get  $\Phi$ , and then taking the appropriate derivative or cross-derivative.

The results in part (e) follow from setting optimal  $\mu$  to 0, which means  $\phi = B/\lambda f$  and  $\Phi = (1-\theta)(1-\beta)B/\lambda f$ . The comparative statics results in the corollary follow immediately. ■

## **Online Appendix B. The legal framework for securities markets in China**

China has three state laws that constitute the highest legal authority among security-related statutes: the Securities Law, which regulates issuing and trading securities, the Company Law, which regulates the organization and behavior of public and private companies, and the Securities Investment Fund Law, which regulates public and private securities investment fund activities. Article 7 of the Securities Law gives the CSRC the responsibility for exercising centralized and unified regulation over the nationwide securities markets.<sup>1</sup>

Since civil litigation systems in China are relatively immature, CSRC enforcement actions are the main legal mechanism for disciplining Chinese listed firms and their management. The current CSRC enforcement system separates hearings from case investigations to enhance the efficiency and fairness of enforcement actions. The Enforcement Bureau (Chief Enforcement Office), Enforcement Contingent, and the enforcement departments of CSRC regional offices work together in case filing, investigation and implementation of administrative sanctions, while the Administrative Sanction Committee is mainly responsible for hearings and proposing administrative sanction opinions.

In relation to violations of securities laws, CSRC may impose administrative sanctions or ban market entry on the liable entity or individual. CSRC administrative sanctions include the following types of penalties: orders to rectify illegal conduct, warning, fine, and confiscation of illegal income. According to CSRC annual report, in 2013, CSRC received 611 case leads, and probed into 350 cases, among which 41 suspected criminal cases were referred to the judicial authority, and 86 cases were closed within the same year. These cases involve financial misreporting, tunneling, insider trading, and others. Based on investigation of these cases, the CSRC made 79 decisions on administrative sanctions, and made 21 decisions to bar market entries of 38 individuals, including permanent bars on 25 individuals. Because CSRC enforcement actions have significant negative impact on stock price and may even lead to the replacement of the CEO and board of directors and other executives (Chen, Firth, Gao, and Rui, 2005, 2006; Chen, Cumming, Hou, and Li, 2016), the CSRC has established its credibility as the main legal watchdog against corporate securities fraud in China.

---

<sup>1</sup> Article 179 of the Securities Law mandates that CSRC shall perform the following regulatory duties for the securities market: (1) to formulate regulations and rules for the regulation of the securities markets and exercise the authority of approval and authorization pursuant to applicable laws; (2) to regulate the issuance, listing, trading, registration, depository and clearance of securities; (3) to regulate securities-related business of issuers, listed companies, securities companies, securities investment fund management companies, securities service institutions, stock exchanges and securities registrar and clearance institutions; (5) to supervise and inspect information disclosure concerning the issuance, listing and trading of securities; (6) to investigate and penalize violations of laws or administrative regulations governing the securities markets; (7) other duties as applied by applicable laws and administrative regulations.

## Online Appendix C. Variable definition

| Variable                 | Definition                                                                                                                                                                                                |
|--------------------------|-----------------------------------------------------------------------------------------------------------------------------------------------------------------------------------------------------------|
| Fraud Indicator          | an indicator variable that equals one if a firm is detected committing financial misreporting by Chinese Securities Regulatory Commission (CSRC) in a specific year, and zero otherwise                   |
| Financial Liberalization | an indicator variable that equals one if a firm is located in a city that allow foreign banks to conduct local currency-related business in a specific year (i.e. foreign bank entry), and zero otherwise |
| Size                     | logged value of total assets                                                                                                                                                                              |
| Total Assets             | total assets in billion Yuan                                                                                                                                                                              |
| Leverage                 | total liabilities/ total assets                                                                                                                                                                           |
| ROA                      | earnings before interest and tax (EBIT)/total assets                                                                                                                                                      |
| Sales Growth             | percentage change in net sales from last year                                                                                                                                                             |
| Largest Shareholder      | number of shares held by the largest shareholder/total number of shares outstanding                                                                                                                       |
| State Ownership          | number of shares held by the State/total number of shares outstanding                                                                                                                                     |
| Indicator (t-3)          | an indicator variable that equals one for three years before the year banking liberalization started in a specific city                                                                                   |
| Indicator (t-2)          | an indicator variable that equals one for two years before the year banking liberalization started in a specific city                                                                                     |
| Indicator (t-1)          | an indicator variable that equals one for one year before the year banking liberalization started in a specific city                                                                                      |
| Indicator (t+1)          | an indicator variable that equals one for one year after the year banking liberalization started in a specific city                                                                                       |
| Indicator (t+2)          | an indicator variable that equals one for two years after the year banking liberalization started in a specific city                                                                                      |
| Indicator (t+3)          | an indicator variable that equals one for three years after the year banking liberalization started in a specific city                                                                                    |
| Indicator After (t+3)    | an indicator variable that equals one for more than three years after the year banking liberalization started in a specific city                                                                          |

## Online Appendix D. Additional Results

### Appendix Table 1

#### Distribution of Fraud by Province.

This table summarizes the distribution of fraud by the province in which firms are headquartered. The sample consists of firms listed on mainland China's stock exchanges during the 2000 to 2010 period. Columns (1)– (5) report the provinces in which firms are headquartered, total number of firms, the number of fraud and non-fraud firms, and the percentage of fraud firms, respectively.

| (1)<br><b>Province</b>                       | (2)<br><b>Total Firms</b> | (3)<br><b>Fraud Firms</b> | (4)<br><b>Non-Fraud Firms</b> | (5)<br><b>% Fraud Firms</b> |
|----------------------------------------------|---------------------------|---------------------------|-------------------------------|-----------------------------|
| <i>Panel A Eastern and Coastal Provinces</i> |                           |                           |                               |                             |
| Zhejiang                                     | 943                       | 17                        | 926                           | 1.80%                       |
| Shanghai                                     | 1,223                     | 33                        | 1,190                         | 2.70%                       |
| Guangdong                                    | 1,898                     | 69                        | 1,829                         | 3.64%                       |
| Jiangsu                                      | 943                       | 15                        | 928                           | 1.59%                       |
| Shandong                                     | 777                       | 20                        | 757                           | 2.57%                       |
| Liaoning                                     | 545                       | 22                        | 523                           | 4.04%                       |
| Beijing                                      | 864                       | 21                        | 843                           | 2.43%                       |
| Fujian                                       | 476                       | 18                        | 458                           | 3.87%                       |
| Hebei                                        | 312                       | 11                        | 301                           | 3.53%                       |
| Tianjin                                      | 228                       | 10                        | 218                           | 4.39%                       |
| Hainan                                       | 202                       | 11                        | 191                           | 5.45%                       |
| Total                                        | 8,411                     | 247                       | 8,164                         | 2.94%                       |
| <i>Panel B Central Provinces</i>             |                           |                           |                               |                             |
| Henan                                        | 344                       | 10                        | 334                           | 2.91%                       |
| Anhui                                        | 441                       | 15                        | 426                           | 3.40%                       |
| Shanxi                                       | 218                       | 5                         | 213                           | 2.29%                       |
| Hunan                                        | 434                       | 27                        | 407                           | 6.22%                       |
| Hubei                                        | 611                       | 23                        | 588                           | 3.76%                       |
| Jiangxi                                      | 249                       | 7                         | 242                           | 2.81%                       |
| Jilin                                        | 328                       | 15                        | 313                           | 4.57%                       |
| Heilongjiang                                 | 263                       | 21                        | 242                           | 7.98%                       |
| Total                                        | 2,888                     | 123                       | 2,765                         | 4.26%                       |
| <i>Panel C Western Provinces</i>             |                           |                           |                               |                             |
| Chongqing                                    | 288                       | 13                        | 275                           | 4.51%                       |
| Ningxia                                      | 108                       | 5                         | 103                           | 4.63%                       |
| Shaanxi                                      | 261                       | 10                        | 251                           | 3.83%                       |
| Yunnan                                       | 196                       | 6                         | 190                           | 3.06%                       |
| Sichuan                                      | 603                       | 36                        | 567                           | 5.97%                       |
| Guangxi                                      | 244                       | 11                        | 233                           | 4.51%                       |
| Guizhou                                      | 147                       | 6                         | 141                           | 4.08%                       |
| Neimenggu                                    | 160                       | 6                         | 154                           | 3.75%                       |
| Gansu                                        | 197                       | 17                        | 180                           | 8.63%                       |
| Xinjiang                                     | 285                       | 15                        | 270                           | 5.26%                       |
| Qinghai                                      | 76                        | 7                         | 69                            | 9.21%                       |
| Tibet                                        | 67                        | 6                         | 61                            | 8.96%                       |
| Total                                        | 2,632                     | 138                       | 2,494                         | 5.24%                       |
| Total                                        | 13,931                    | 508                       | 13,423                        | 3.65%                       |

## Appendix Table 2

Timing of Banking Liberalization and Distribution of Firms that Enter the Treatment.

This table describes the timing of banking liberalization. The sample consists of firms listed on mainland China's stock exchanges during the 2000 to 2010 period. Columns (1)– (3) report year, list of liberalized cities in that year, and total number of firms in liberalized cities, respectively.

| (1)<br><b>Year</b> | (2)<br><b>List of Liberalized Cities</b>                           | (3)<br><b>No. of Firms</b> |
|--------------------|--------------------------------------------------------------------|----------------------------|
| 2001               | Shanghai, Shenzhen, Tianjin, and Dalian                            | 199                        |
| 2002               | Guangzhou, Zhuhai, Qingdao, Nanjing, and Wuhan                     | 74                         |
| 2003               | Jinan, Fuzhou, Chengdu, and Chongqing                              | 74                         |
| 2004               | Kunming, Beijing, Xiamen, Xian, and Shenyang                       | 131                        |
| 2005               | Shantou, Ningbo, Harbin, Changchun, Lanzhou, Yinchuan, and Nanning | 71                         |
| 2006               | Remaining Cities in China                                          | 641                        |

### Appendix Table 3

#### Propensity Score Matching Results.

This table examines the impact of banking liberalization using propensity score matching method to adjust for pre-treatment observable differences (i.e., *Size, Leverage, ROA, Sales Growth, Largest Shareholder, State Ownership*) between treated and untreated firms. The sample consists of firms listed on mainland China's stock exchanges during the period 2000 to 2010. Baseline probit regression results in model (1) of Table 2 are reported in Column (1). Baseline results with additional controls for estimated self-selection parameters (inverse Mills ratios) are reported in Column (2). Weighted probit regression results using estimated self-selection parameters are reported in Column (3). Firm controls include *Size, Leverage, ROA, Sales Growth, Largest Shareholder, State Ownership*. Robust standard errors are clustered at the industry levels with *t*-statistics reported in parentheses. Coefficients marked with \*, \*\*, and \*\*\* are significant at the 0.1, 0.05, and 0.01 levels, respectively.

| Explanatory Variables    | Dependent Variable: Whether a Firm is Detected Committing Fraud |                                   |                      |
|--------------------------|-----------------------------------------------------------------|-----------------------------------|----------------------|
|                          | Baseline                                                        | Propensity Score Matching Methods |                      |
|                          | (1)                                                             | (2)                               | (3)                  |
| Financial Liberalization | -0.263***<br>(-3.04)                                            | -0.279***<br>(-2.78)              | -0.242***<br>(-2.97) |
| Year Dummies             | Y                                                               | Y                                 | Y                    |
| Industry Dummies         | Y                                                               | Y                                 | Y                    |
| Province Dummies         | Y                                                               | Y                                 | Y                    |
| Firm Controls            | Y                                                               | Y                                 | Y                    |
| No. of Obs.              | 8,435                                                           | 7,718                             | 8,435                |
| No. of Fraud Obs.        | 369                                                             | 334                               | 369                  |
| % of Fraud Obs.          | 4.37%                                                           | 4.33%                             | 4.37%                |
| Pseudo R-sq              | 0.153                                                           | 0.162                             | 0.156                |

## Appendix Table 4

### Robustness to Treatment Heterogeneity.

This table presents estimations from staggered difference-in-difference regressions, robust to treatment heterogeneity. Panel A presents our base staggered difference-in-difference estimators while keeping firms only for five years, four years, and three years after the treatment, respectively. Panel B presents results based on the stacked regression estimator of Cengiz et al. (2019). In Panel A, the full sample consists of firms listed on mainland China's stock exchanges during the period 2000 to 2010. In Panel B, the sample consists of firms listed on mainland China's stock exchanges during the period 2000 to 2010 in Column (1) and 2002 to 2006 in Column (2). Baseline probit regression results in model (1) of Table 2 are reported in Column (1) of Panel A. Panel A also reports our base staggered difference-in-difference estimators while keeping firms only for five years (Column 2), four years (Column 3), and three years after the treatment (Column 4), respectively. In Panel B, Column (1) presents our base staggered difference-in-difference estimator while keeping firms only for four years after the treatment. Column (2) presents results based on the stacked regression estimator of Cengiz et al. (2019), year time windows centered around each stacked-sample event. In Panels A and B, firm controls include *Size*, *Leverage*, *ROA*, *Sales Growth*, *Largest Shareholder*, *State Ownership*. Robust standard errors are clustered at the industry levels with *t*-statistics reported in parentheses. Coefficients marked with \*, \*\*, and \*\*\* are significant at the 0.1, 0.05, and 0.01 levels, respectively.

### Panel A: Staggered Difference-in-Difference Estimators

| Explanatory Variables    | Dependent Variable: Whether a Firm is Detected Committing Fraud |                                                                      |                                                                      |                                                                      |
|--------------------------|-----------------------------------------------------------------|----------------------------------------------------------------------|----------------------------------------------------------------------|----------------------------------------------------------------------|
|                          | Base Staggered Estimator                                        | Base Staggered Estimator with Only 5 Years After Event in the Sample | Base Staggered Estimator with Only 4 Years After Event in the Sample | Base Staggered Estimator with Only 3 Years After Event in the Sample |
|                          | (1)                                                             | (2)                                                                  | (3)                                                                  | (4)                                                                  |
| Financial Liberalization | -0.263***<br>(-3.04)                                            | -0.363***<br>(-3.37)                                                 | -0.391***<br>(-3.25)                                                 | -0.343***<br>(-2.80)                                                 |
| Year Dummies             | Y                                                               | Y                                                                    | Y                                                                    | Y                                                                    |
| Industry Dummies         | Y                                                               | Y                                                                    | Y                                                                    | Y                                                                    |
| Province Dummies         | Y                                                               | Y                                                                    | Y                                                                    | Y                                                                    |
| Firm Controls            | Y                                                               | Y                                                                    | Y                                                                    | Y                                                                    |
| No. of Obs.              | 8,435                                                           | 6,822                                                                | 6,235                                                                | 4,950                                                                |
| No. of Fraud Obs.        | 369                                                             | 310                                                                  | 289                                                                  | 241                                                                  |
| % of Fraud Obs.          | 4.37%                                                           | 4.54%                                                                | 4.64%                                                                | 4.87%                                                                |
| Pseudo R-sq              | 0.153                                                           | 0.157                                                                | 0.159                                                                | 0.175                                                                |

**Panel B: Cengiz et al.'s (2019) Estimator**

| Explanatory Variables    | Dependent Variable: Whether a Firm is Detected Committing Fraud |                                  |
|--------------------------|-----------------------------------------------------------------|----------------------------------|
|                          | Base Staggered Estimator                                        | Cengiz et al.'s (2019) Estimator |
| Financial Liberalization | -0.391***<br>(-3.25)                                            |                                  |
| Indicator (t-3)          |                                                                 | -0.001<br>(-0.13)                |
| Indicator (t-2)          |                                                                 | 0.002<br>(0.23)                  |
| Indicator (t-1)          |                                                                 | -0.009<br>(-1.52)                |
| Indicator (t+1)          |                                                                 | -0.019**<br>(-2.59)              |
| Indicator (t+2)          |                                                                 | -0.027***<br>(-4.05)             |
| Indicator (t+3)          |                                                                 | -0.028***<br>(-3.46)             |
| Indicator After (t+3)    |                                                                 | -0.032***<br>(-4.18)             |
| Year Dummies             | Y                                                               | Y                                |
| Industry Dummies         | Y                                                               | Y                                |
| Province Dummies         | Y                                                               | Y                                |
| Firm Controls            | Y                                                               | Y                                |
| No. of Obs.              | 6,235                                                           | 34,886                           |
| Pseudo R-sq/R-sq         | 0.159                                                           | 0.068                            |

## Appendix Table 5

### Robustness Test Results Related to Parallel Trend Assumptions.

This table reports robustness test results related to parallel trend assumptions. Panel A reports robustness placebo test results concerning Column (2) of Table 6, whereby we pretend that bank liberalization occurred three years before (Column (2)), two years before (Column (3)), one year before (Column (4)), one year after (Column (5)), two years after (Column (6)), and three years after (Column (7)) the actual year (Column (1)). Panel B reports robustness results concerning Column (1) of Table 2 after controlling for separated linear time trends between pilot and non-pilot cities. *Pilot City Indicator* equals one if a firm is in one of the top three, five and ten pilot cities in Columns (1), (2), (3), respectively and zero otherwise. Firm controls in Panel B include *Size*, *Leverage*, *ROA*, *Sales Growth*, *Largest Shareholder*, *State Ownership*. The sample consists of firms listed on mainland China's stock exchanges during the period 2002 to 2006 in Column (1) and 2000 to 2010 in Columns (2). Robust standard errors are clustered at the industry levels with t-statistics reported in parentheses. Coefficients marked with \*, \*\*, and \*\*\* are significant at the 0.1, 0.05, and 0.01 levels, respectively.

### Panel A: Placebo Test Results

| Explanatory Variables    | Dependent Variable: Whether a Firm is Detected Committing Fraud |                               |                               |                              |                             |                              |                              |
|--------------------------|-----------------------------------------------------------------|-------------------------------|-------------------------------|------------------------------|-----------------------------|------------------------------|------------------------------|
|                          | Actual Year<br>(t)                                              | Placebo 3 Yrs<br>Before (t-3) | Placebo 2 Yrs<br>Before (t-2) | Placebo 1 Yr<br>Before (t-1) | Placebo 1 Yr<br>After (t+1) | Placebo 2 Yrs<br>After (t+2) | Placebo 3 Yrs<br>After (t+3) |
|                          | (1)                                                             | (2)                           | (3)                           | (4)                          | (5)                         | (6)                          | (7)                          |
| Financial Liberalization | -0.344***<br>(-3.58)                                            | -0.118<br>(-1.17)             | -0.217**<br>(-2.41)           | -0.291***<br>(-3.73)         | -0.416***<br>(-5.46)        | -0.346***<br>(-2.92)         | -0.153*<br>(-1.68)           |
| Year Dummies             | Y                                                               | Y                             | Y                             | Y                            | Y                           | Y                            | Y                            |
| Industry Dummies         | Y                                                               | Y                             | Y                             | Y                            | Y                           | Y                            | Y                            |
| Province Dummies         | Y                                                               | Y                             | Y                             | Y                            | Y                           | Y                            | Y                            |
| No. of Obs.              | 5,504                                                           | 5,504                         | 5,504                         | 5,504                        | 5,504                       | 5,504                        | 5,504                        |
| No. of Fraud Obs.        | 231                                                             | 231                           | 231                           | 231                          | 231                         | 231                          | 231                          |
| % of Fraud Obs.          | 4.20%                                                           | 4.20%                         | 4.20%                         | 4.20%                        | 4.20%                       | 4.20%                        | 4.20%                        |
| Pseudo R-sq              | 0.085                                                           | 0.080                         | 0.082                         | 0.084                        | 0.086                       | 0.082                        | 0.080                        |

## Panel B: Controlling for Separated Linear Time Trends

| Explanatory Variables               | Dependent Variable: Whether a Firm is Detected Committing Fraud |                      |                      |
|-------------------------------------|-----------------------------------------------------------------|----------------------|----------------------|
|                                     | Top 3 Pilot City                                                | Top 5 Pilot City     | Top 10 Pilot City    |
|                                     | (1)                                                             | (2)                  | (3)                  |
| Financial Liberalization            | -0.172***<br>(-4.40)                                            | -0.173***<br>(-4.54) | -0.142***<br>(-3.89) |
| Linear Trend * Pilot City Indicator | Y                                                               | Y                    | Y                    |
| Year Dummies                        | Y                                                               | Y                    | Y                    |
| Industry Dummies                    | Y                                                               | Y                    | Y                    |
| Province Dummies                    | Y                                                               | N                    | N                    |
| Firm Controls                       | Y                                                               | Y                    | Y                    |
| No. of Obs.                         | 8,435                                                           | 8,435                | 8,435                |
| No. of Fraud Obs.                   | 369                                                             | 369                  | 369                  |
| % of Fraud Obs.                     | 4.37%                                                           | 4.37%                | 4.37%                |
| Pseudo R-sq                         | 0.148                                                           | 0.148                | 0.147                |

## Appendix Table 6

### Foreign Bank Presence following Banking Liberalization.

This table describes foreign bank presence following the shock. The sample consists of loans granted to firms listed on Mainland China's stock exchanges during the period 2001 to 2016 (i.e., the period between the initial shock and ten years after the final shock). Panel A presents total number and value of foreign loans issued by the top 15 foreign banks, ranked by total value of foreign loans issued during the sample period. Panel B presents total number of foreign banks and number of foreign loans issued to firms located in each pilot city, ranked by number of foreign banks in a city. Panel C presents number of firms with new loans and among them, percentage of firms with new foreign loans during each year after banking liberalization.

#### Panel A: Top 15 Foreign Banks

| (1)  | (2)                           | (3)              | (3)                                            | (5)                  |
|------|-------------------------------|------------------|------------------------------------------------|----------------------|
| Rank | Bank                          | Country (Region) | Value of Foreign Loans (in <i>billion</i> RMB) | No. of Foreign Loans |
| 1    | HSBC                          | U.K.             | 110.0                                          | 518                  |
| 2    | The Bank of East Asia         | Hong Kong, China | 30.0                                           | 131                  |
| 3    | OCBC Bank                     | Singapore        | 24.0                                           | 136                  |
| 4    | Standard Chartered Bank       | U.K.             | 24.0                                           | 89                   |
| 5    | Citibank                      | United States    | 14.0                                           | 237                  |
| 6    | Nanyang Commercial Bank       | Hong Kong, China | 8.8                                            | 93                   |
| 7    | ABN AMRO Bank                 | Netherlands      | 8.3                                            | 18                   |
| 8    | Chinese Mercantile Bank       | Hong Kong, China | 7.8                                            | 41                   |
| 9    | Development Bank of Singapore | Singapore        | 6.4                                            | 53                   |
| 10   | Hang Seng Bank                | Hong Kong, China | 4.7                                            | 72                   |
| 11   | ANZ Bank                      | Australia        | 4.5                                            | 42                   |
| 12   | Hana Bank                     | South Korea      | 4.2                                            | 35                   |
| 13   | United Overseas Bank          | Singapore        | 3.6                                            | 52                   |
| 14   | BNP PARIBAS                   | France           | 3.1                                            | 33                   |
| 15   | J.P. Morgan                   | United States    | 2.5                                            | 15                   |

**Panel B: Distribution of Foreign Banks and Foreign Loans by Pilot Cities**

| (1)<br>City | (2)<br>Liberalization Year | (3)<br>No. of Foreign Banks | (4)<br>No. of Foreign Loans |
|-------------|----------------------------|-----------------------------|-----------------------------|
| Shenzhen    | 2001                       | 33                          | 475                         |
| Shanghai    | 2001                       | 33                          | 144                         |
| Beijing     | 2004                       | 22                          | 103                         |
| Tianjin     | 2001                       | 16                          | 64                          |
| Guangzhou   | 2002                       | 16                          | 44                          |
| Zhuhai      | 2002                       | 11                          | 31                          |
| Fuzhou      | 2003                       | 11                          | 31                          |
| Xiamen      | 2004                       | 8                           | 21                          |
| Nanjing     | 2002                       | 5                           | 17                          |
| Wuhan       | 2002                       | 5                           | 12                          |
| Kunming     | 2004                       | 5                           | 6                           |
| Qingdao     | 2002                       | 4                           | 7                           |
| Chengdu     | 2003                       | 4                           | 7                           |
| Shantou     | 2005                       | 4                           | 6                           |
| Shenyang    | 2004                       | 4                           | 5                           |
| Dalian      | 2001                       | 3                           | 18                          |
| Harbin      | 2005                       | 3                           | 7                           |
| Ningbo      | 2005                       | 3                           | 4                           |
| Nanning     | 2005                       | 3                           | 3                           |
| Chongqing   | 2003                       | 2                           | 4                           |
| Jinan       | 2003                       | 2                           | 3                           |
| Changchun   | 2005                       | 1                           | 7                           |
| Xian        | 2004                       | 1                           | 1                           |
| Lanzhou     | 2005                       | 1                           | 1                           |
| Yinchuan    | 2005                       | 0                           | 0                           |

**Panel C: Change in Percentage of Firms with New Foreign Loans**

| (1)<br>Year after Liberalization | (2)<br>No. of Firms with New Loans | (3)<br>% of Firms with New Foreign Loans |
|----------------------------------|------------------------------------|------------------------------------------|
| 0                                | 110                                | 0.91%                                    |
| 1                                | 237                                | 3.38%                                    |
| 2                                | 376                                | 2.66%                                    |
| 3                                | 435                                | 2.30%                                    |
| 4                                | 445                                | 3.15%                                    |
| 5                                | 518                                | 5.60%                                    |
| 6                                | 867                                | 5.42%                                    |
| 7                                | 1,012                              | 9.29%                                    |
| 8                                | 1,327                              | 9.87%                                    |
| 9                                | 1,557                              | 11.69%                                   |

## Appendix Table 7

### Client of Foreign versus Domestic Banks.

This table compares the characteristics of foreign versus domestic bank clients. The sample consists of firms listed on mainland China's stock exchanges during the period 2000 to 2010 in Column (1), and a subsample of these firms located in liberalized cities in Column (2). Probit estimation results based on the full sample and the subsample are presented in Columns (1)-(3), and (4)-(6), respectively. The dependent variable is an indicator variable that equals one if a firm is a foreign bank client, and zero otherwise. Robust standard errors are clustered at the industry levels with *t*-statistics reported in parentheses. Coefficients marked with \*, \*\*, and \*\*\* are significant at the 0.1, 0.05, and 0.01 levels, respectively.

| Explanatory Variables | Dependent Variable: Foreign Bank Client Indicator |                      |                      |                                |                      |                      |
|-----------------------|---------------------------------------------------|----------------------|----------------------|--------------------------------|----------------------|----------------------|
|                       | Full Sample                                       |                      |                      | Subsample After Liberalization |                      |                      |
|                       | (1)                                               | (2)                  | (3)                  | (4)                            | (5)                  | (6)                  |
| Asset Tangibility     | 0.864**<br>(2.23)                                 | 0.303<br>(0.69)      | 0.177<br>(0.38)      | 0.864**<br>(2.34)              | 0.277<br>(0.60)      | 0.083<br>(0.16)      |
| Size                  | 0.170***<br>(4.77)                                | 0.186***<br>(6.47)   | 0.182***<br>(6.30)   | 0.294***<br>(2.76)             | 0.257**<br>(2.08)    | 0.296**<br>(2.48)    |
| Leverage              | 0.318***<br>(3.06)                                | 0.282**<br>(2.35)    | 0.330***<br>(2.93)   | 1.498***<br>(2.64)             | 1.744***<br>(3.52)   | 1.683***<br>(3.70)   |
| ROA                   | 1.430***<br>(3.02)                                | 1.659***<br>(4.23)   | 1.549***<br>(4.37)   | 0.105**<br>(2.41)              | 0.100**<br>(2.41)    | 0.116**<br>(2.33)    |
| Sales Growth          | 0.0691*<br>(1.83)                                 | 0.0668*<br>(1.88)    | 0.0836**<br>(2.05)   | 0.176***<br>(4.85)             | 0.198***<br>(7.35)   | 0.200***<br>(7.69)   |
| Largest Shareholder   | 0.513*<br>(1.77)                                  | 0.501*<br>(1.75)     | 0.609**<br>(2.34)    | 0.680***<br>(2.64)             | 0.669***<br>(2.59)   | 0.765***<br>(3.41)   |
| State Ownership       | -0.587***<br>(-4.83)                              | -0.488***<br>(-4.66) | -0.415***<br>(-3.71) | -0.667***<br>(-4.61)           | -0.563***<br>(-4.05) | -0.503***<br>(-3.50) |
| Year Dummies          | Y                                                 | Y                    | Y                    | Y                              | Y                    | Y                    |
| Industry Dummies      | N                                                 | Y                    | Y                    | N                              | Y                    | Y                    |
| Province Dummies      | N                                                 | N                    | Y                    | N                              | N                    | Y                    |
| No. of Obs.           | 7,706                                             | 7,706                | 7,553                | 5,977                          | 5,977                | 5,882                |
| No. of Fraud Obs.     | 334                                               | 334                  | 320                  | 241                            | 241                  | 233                  |
| % of Fraud Obs.       | 4.33%                                             | 4.33%                | 4.24%                | 4.03%                          | 4.03%                | 3.96%                |
| Pseudo R-sq           | 0.035                                             | 0.049                | 0.088                | 0.043                          | 0.060                | 0.104                |

## Appendix Table 8

Subsample Analysis for Firms with and without Increasing Long-Term Loans.

This table analyzes the impact of banking liberalization and long-term loans. The dependent variable is one if a firm is detected committing financial misreporting in a specific year by CSRC, and zero otherwise. The sample consists of firms listed on mainland China's stock exchanges during the period 2000 to 2010. Columns (1)– (3) present probit regression results based on the full sample and the subsamples of firms with and without increasing long-term loan ratios after banking liberalization, respectively. *Long-Term (Short-Term) Loan Ratio* is defined as long-term (short-term) loans divided by total assets. Robust standard errors are clustered at the industry levels with *t*-statistics reported in parentheses. Coefficients marked with \*, \*\*, and \*\*\* are significant at the 0.1, 0.05, and 0.01 levels, respectively. *Chi-square* statistics and *P*-values associated with the test of whether the coefficient estimates of *Financial Liberalization* differ between subsamples are presented below the subsample regression results.

| Explanatory Variables                                                          | Dependent Variable: Whether a Firm is Detected Committing Fraud |                                            |                                               |
|--------------------------------------------------------------------------------|-----------------------------------------------------------------|--------------------------------------------|-----------------------------------------------|
|                                                                                | Subsample Analysis                                              |                                            |                                               |
|                                                                                | Full Sample                                                     | Firms with Increasing Long-Term Loan Ratio | Firms without Increasing Long-Term Loan Ratio |
|                                                                                | (1)                                                             | (2)                                        | (3)                                           |
| Financial Liberalization                                                       | -0.289***<br>(-3.73)                                            | -0.380***<br>(-3.39)                       | -0.0913<br>(-0.52)                            |
| Long-Term Loan Ratio                                                           | -0.579*<br>(-1.91)                                              | -0.687*<br>(-1.79)                         | -0.328<br>(-0.62)                             |
| Short-Term Loan Ratio                                                          | 0.980***<br>(5.18)                                              | 1.221***<br>(6.08)                         | 0.581<br>(1.57)                               |
| Year Dummies                                                                   | Y                                                               | Y                                          | Y                                             |
| Industry Dummies                                                               | Y                                                               | Y                                          | Y                                             |
| Province Dummies                                                               | Y                                                               | Y                                          | Y                                             |
| Firm Controls                                                                  | Y                                                               | Y                                          | Y                                             |
| No. of Obs.                                                                    | 8,341                                                           | 5,190                                      | 2,791                                         |
| No. of Fraud Obs.                                                              | 367                                                             | 257                                        | 110                                           |
| % of Fraud Obs.                                                                | 4.40%                                                           | 4.95%                                      | 3.94%                                         |
| Pseudo R-sq                                                                    | 0.161                                                           | 0.157                                      | 0.215                                         |
| Tests for <i>Differences in Financial Liberalization</i> Coefficient Estimates |                                                                 |                                            | (2)-(3)                                       |
| <i>Chi</i> -square                                                             |                                                                 |                                            | 14.290***                                     |
| <i>P</i> -Value                                                                |                                                                 |                                            | 0.001                                         |
